# Supplementary material for: Readily available phosphorous and nitrogen counteract for arsenic uptake and distribution in wheat (Triticum aestivum L.)
Source: PubMed Central journal article supplement — Sci Rep. 2014 May 13;4:4944. doi: 10.1038/srep04944 (PMC4018613; doi:10.1038/srep04944), 2014-05-13
Supplement: srep04944-s1.pdf [file srep04944-s1.pdf]

# Readily available phosphorous and nitrogen counteract for arsenic uptake and distribution in wheat (*Triticum aestivum* L.)

Carsten Brackhage<sup>\*1</sup>, Jen-How Huang<sup>2</sup>, Jörg Schaller<sup>1</sup>, Evert J. Elzinga<sup>3</sup>, E. Gert Dudel<sup>1</sup>

<sup>1</sup> Institute of General Ecology and Environmental Protection, Technische Universität Dresden, Tharandt, Germany

<sup>2</sup> Environmental Geosciences, University of Basel, Basel, Switzerland

<sup>3</sup> Department of Earth & Environmental Sciences, Rutgers University, Newark, New Jersey, USA

## Supplementary Information

Table S1: Selected physical and chemical properties of the two different soils (S1, S2).

| Property                     | S1              | S2               |
|------------------------------|-----------------|------------------|
| Particle size (%)            |                 |                  |
| 2000-630 $\mu\text{m}$       | $1.8 \pm 0.2$   | $5.4 \pm 0.5$    |
| 630-200 $\mu\text{m}$        | $67.3 \pm 1.9$  | $12.5 \pm 0.5$   |
| 200-63 $\mu\text{m}$         | $17.4 \pm 2.2$  | $12.1 \pm 0.6$   |
| 63-20 $\mu\text{m}$          | $4.7 \pm 1.7$   | $13.2 \pm 1.0$   |
| 20-6.3 $\mu\text{m}$         | $2.5 \pm 1.7$   | $10.5 \pm 0.5$   |
| 6.3-2 $\mu\text{m}$          | $1.3 \pm 1.0$   | $7.7 \pm 1.2$    |
| < 2 $\mu\text{m}$            | $4.9 \pm 0.5$   | $38.5 \pm 0.6$   |
| pH (CaCl <sub>2</sub> )      | $5.3 \pm 0.1$   | $6.0 \pm 0.1$    |
| CEC (cmol kg <sup>-1</sup> ) | $5.4 \pm 0.4$   | $29.4 \pm 1.3$   |
| C (%)                        | $2.2 \pm 0.3$   | $3.2 \pm 0.1$    |
| N (%)                        | $0.11 \pm 0.01$ | $0.35 \pm 0.01$  |
| C/N ratio                    | $20.6 \pm 0.7$  | $9.1 \pm 0.1$    |
| P (mg g <sup>-1</sup> )      | $0.76 \pm 0.04$ | $1.12 \pm 0.13$  |
| Fe (mg g <sup>-1</sup> )     | $18.7 \pm 0.6$  | $59.1 \pm 1.7$   |
| Mn (mg g <sup>-1</sup> )     | $0.33 \pm 0.01$ | $0.41 \pm 0.02$  |
| Cu ( $\mu\text{g g}^{-1}$ )  | $47.4 \pm 2.0$  | $14.9 \pm 0.4$   |
| Zn ( $\mu\text{g g}^{-1}$ )  | $244 \pm 8$     | $58 \pm 7$       |
| As ( $\mu\text{g g}^{-1}$ )  | $26.5 \pm 1.5$  | $163.9 \pm 12.3$ |

Table S2: Results of the ANOVA tests for the effects of moisture treatment (moist), P- and N-fertilization on total As concentrations in different plant parts.

|                  | <b>grain</b> |           | <b>leaf</b> |           | <b>stem</b> |           | <b>root</b> |          |
|------------------|--------------|-----------|-------------|-----------|-------------|-----------|-------------|----------|
|                  | Expl. Var.   | F-Value   | Expl. Var.  | F-Value   | Expl. Var.  | F-Value   | Expl. Var.  | F-Value  |
|                  | %            |           | %           |           | %           |           | %           |          |
| <b>S1 (sand)</b> |              |           |             |           |             |           |             |          |
| moist            | 0.2          | 0.6 ns    | 3.2         | 51.5 ***  | 0.0         | 0.1 ns    | 7.7         | 5.9 *    |
| P                | 61.9         | 166.7 *** | 38.8        | 613.7 *** | 83.4        | 359.6 *** | 16.4        | 12.5 **  |
| N                | 15.1         | 40.7 ***  | 43.8        | 693.4 *** | 7.3         | 31.6 ***  | 10.0        | 7.6 **   |
| moist x P        | 4.5          | 12.0 **   | 0.4         | 5.7 *     | 2.9         | 12.4 **   | 0.0         | 0.0 ns   |
| moist x N        | 1.2          | 3.1 ns    | 0.8         | 12.0 **   | 0.1         | 0.3 ns    | 6.7         | 5.1 *    |
| P x N            | 0.9          | 2.5 ns    | 8.2         | 129.4 *** | 0.9         | 3.9 ns    | 12.3        | 9.4 **   |
| moist x P x N    | 2.2          | 5.8 *     | 0.0         | 0.4 ns    | 0.2         | 0.9 ns    | 5.7         | 4.3 *    |
| Sum Expl.Var.    | 86.0         |           | 95.1        |           | 94.8        |           | 58.7        |          |
| <b>S2 (loam)</b> |              |           |             |           |             |           |             |          |
| moist            |              |           | 12.6        | 32.8 ***  | 6.0         | 5.0 *     | 30.8        | 30.4 *** |
| P                |              |           | 25.5        | 66.5 ***  | 37.9        | 32.0 ***  | 11.4        | 11.2 **  |
| N                |              |           | 32.6        | 85.0 ***  | 4.5         | 3.8 ns    | 1.7         | 1.6 ns   |
| moist x P        |              |           | 11.2        | 29.2 ***  | 6.4         | 5.4 *     | 20.7        | 20.4 *** |
| moist x N        |              |           | 0.0         | 0.0 ns    | 0.0         | 0.0 ns    | 1.4         | 1.4 ns   |
| P x N            |              |           | 2.5         | 6.4 *     | 1.1         | 0.9 ns    | 0.2         | 0.2 ns   |
| moist x P x N    |              |           | 1.3         | 3.4 ns    | 6.2         | 5.2 *     | 1.0         | 1.0 ns   |
| Sum Expl.Var.    |              |           | 85.6        |           | 62.1        |           | 67.2        |          |

Explained Variation (Expl.Var.) in percent and F-values with significance level (ns = not significant; \*: p<0.05; \*\*: p<0.01; \*\*\*: p<0.001).

Table S3: As species concentration in leaf and grain including total As and recovery in percent at the time of harvest (plant dieback).

|                 | As(III)             | DMA                 | MMA                 | As(V)               | Total As            | Recovery |
|-----------------|---------------------|---------------------|---------------------|---------------------|---------------------|----------|
|                 | mg*kg <sup>-1</sup> | %        |
| <b>S1 grain</b> |                     |                     |                     |                     |                     |          |
| P0_NO_70        | 0.121 ±0.004        | <LOD                | <LOD                | 0.126 ±0.050        | 0.217 ±0.047        | 116 ±19  |
| P1_NO_70        | 0.317 ±0.048        | <LOD                | <LOD                | 0.253 ±0.028        | 0.646 ±0.113        | 90 ±12   |
| P0_NO_100+      | 0.151 ±0.012        | <LOD                | <LOD                | 0.126 ±0.019        | 0.389 ±0.118        | 77 ±23   |
| P1_NO_100+      | 0.219 ±0.018        | <LOD                | <LOD                | 0.214 ±0.019        | 0.525 ±0.058        | 83 ±11   |
| <b>leaf</b>     |                     |                     |                     |                     |                     |          |
| P0_NO_70        | 0.054 ±0.011        | 0.009 ±0.002        | <LOD                | 2.99 ±0.335         | 2.829 ±0.248        | 108 ±4   |
| P1_NO_70        | 0.110 ±0.018        | <LOD                | 0.008 ±0.002        | 10.647 ±0.927       | 10.124 ±0.892       | 106 ±6   |
| P0_NO_100+      | 0.051 ±0.008        | 0.016 ±0.004        | <LOD                | 4.997 ±0.596        | 4.721 ±0.526        | 107 ±4   |
| P1_NO_100+      | 0.100 ±0.027        | 0.014 ±0.003        | 0.010 ±0.002        | 14.449 ±1.172       | 12.74 ±1.176        | 115 ±3   |
| <b>S2 grain</b> |                     |                     |                     |                     |                     |          |
| P0_NO_70        | 0.025 ±0.007        | <LOD                | <LOD                | 0.006 ±0.018        | 0.177 ±0.042        | 42 ±1    |
| P1_NO_70        | 0.060 ±0.012        | <LOD                | <LOD                | 0.032 ±0.022        | 0.215 ±0.030        | 47 ±12   |
| P0_NO_100+      | 0.044 ±0.006        | <LOD                | <LOD                | 0.013 ±0.019        | 0.171 ±0.040        | 53 ±16   |
| P1_NO_100+      | 0.067 ±0.025        | <LOD                | <LOD                | 0.021 ±0.029        | 0.204 ±0.050        | 75 ±27   |
| <b>leaf</b>     |                     |                     |                     |                     |                     |          |
| P0_NO_70        | 0.023 ±0.003        | <LOD                | <LOD                | 0.442 ±0.070        | 0.941 ±0.581        | 58 ±19   |
| P1_NO_70        | 0.039 ±0.006        | <LOD                | <LOD                | 1.213 ±0.005        | 1.557 ±0.097        | 81 ±5    |
| P0_NO_100+      | 0.024 ±0.005        | 0.002 ±0.001        | <LOD                | 0.776 ±0.090        | 1.120 ±0.125        | 72 ±1    |
| P1_NO_100+      | 0.036 ±0.006        | 0.003 ±0.001        | <LOD                | 1.898 ±0.282        | 2.353 ±0.294        | 82 ±3    |

## Edge analysis

The near-edge spectra of As collected for leaves following die-off presented in Figure 3b suggest the presence of two As species with different oxidation states. Linear combination fits of the near edge spectra with the reference spectra available did not deliver a good fit of the spectra (not shown), indicating that the reference compounds were not representative of the local chemical environment of As in the leaves. To determine As oxidation state, we took the first derivative of the edge region of the normalized As K edge spectra, and compared these to the first derivatives of the near-edge spectra of the arsenite (As(III)) and arsenate (As(V)) reference compounds (NaAs<sub>2</sub>O<sub>2</sub> and Na<sub>2</sub>HAsO<sub>4</sub>, respectively) and the orpiment (As<sub>2</sub>S<sub>3</sub>) reference. The comparison is demonstrated in the figure below for the spectrum collected at Spot 3 (see Figure 3b of the main manuscript), which is representative of the various spectra collected. The comparison shows that: (1) the peaks in the first derivatives of the three As

reference compounds are well separated, which facilitates the use of the first-derivative spectra to determine As oxidation state; and (2) the derivative of the As K edge spectrum collected at Spot 3 shows two peaks that correspond to the peaks observed in the derivatives of As(III) and As(V), whereas no evidence is found for the presence of significant amounts of As-S species. These findings are consistent with a more oxidizing environment in the dead leaves (relative to fresh leaves) where sulfur ligands have been replaced with oxygen ligands and partial oxidation to As(V) has occurred.

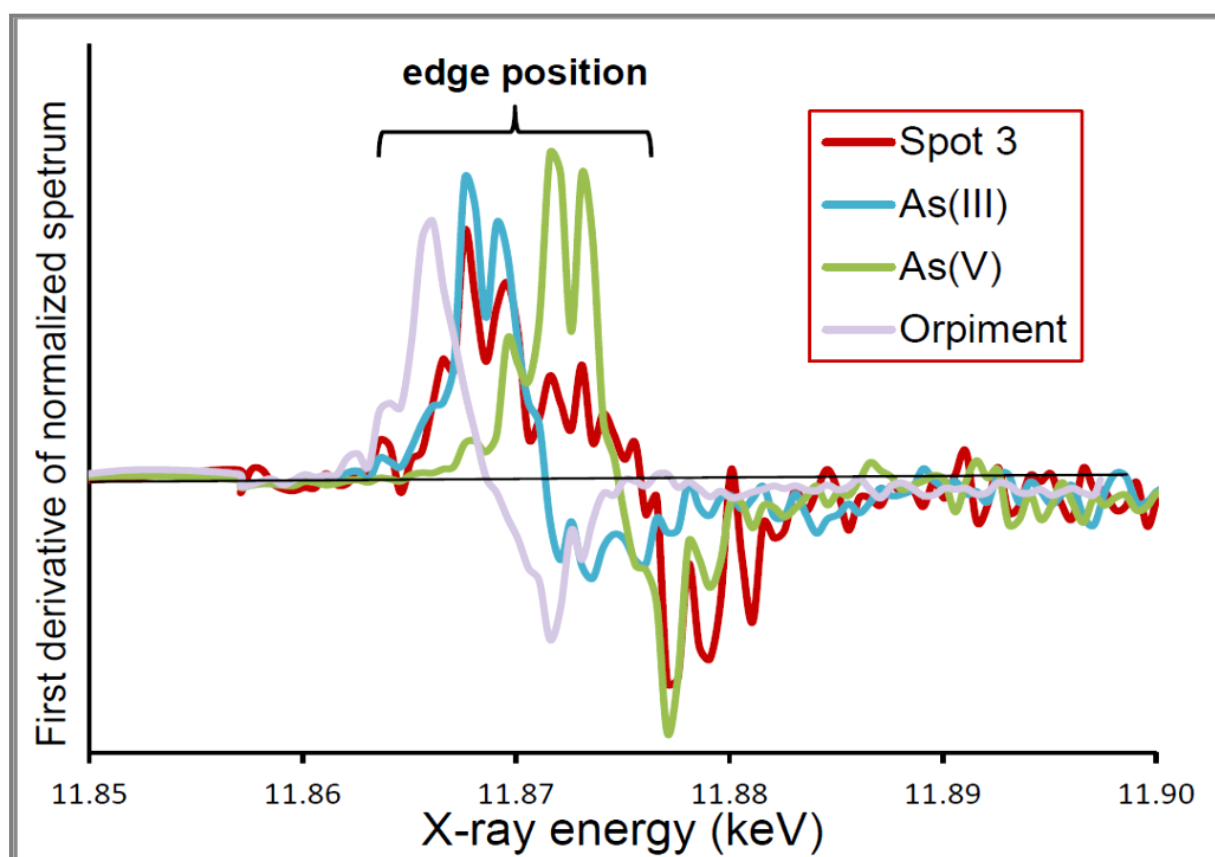

Figure S1. Comparison of the first derivative spectra of the normalized As K edge spectrum collected at Spot 3 in the dead leaf (see Figure 3b of main manuscript) to those of the As(III), As(V) and orpiment reference compounds.

Table S4: As transfer and translocation factors for aboveground plant parts on the sandy soil S1 and on the loamy soil S2 with moisture treatment (70; 100+), P-treatment (P0; P1) and N-treatment (N0; N1); mean with  $\pm$ sd; n=5. “comp.”= plant part

|              | <b>S1 (sandy soil)</b> |                                    | <b>S2 (loamy soil)</b> |                      |
|--------------|------------------------|------------------------------------|------------------------|----------------------|
|              | Transfer factor        | Translocation factor               | Transfer factor        | Translocation factor |
| <b>grain</b> |                        | comp./root                         |                        | comp./root           |
| P0_N0_70     | 0.0085 $\pm$ 0.0023    | 0.045 $\pm$ 0.013                  | 0.0012 $\pm$ 0.0004    | 0.007 $\pm$ 0.002    |
| P1_N0_70     | 0.029 $\pm$ 0.0075     | 0.171 $\pm$ 0.05                   | 0.0013 $\pm$ 0.0002    | 0.02 $\pm$ 0.008     |
| P0_N1_70     | 0.0042 $\pm$ 0.0008    | 0.033 $\pm$ 0.024                  | <LOD                   | <LOD                 |
| P1_N1_70     | 0.0205 $\pm$ 0.0036    | 0.057 $\pm$ 0.018                  | <LOD                   | <LOD                 |
| P0_N0_100+   | 0.0147 $\pm$ 0.0054    | 0.094 $\pm$ 0.053                  | 0.0012 $\pm$ 0         | 0.017 $\pm$ 0.002    |
| P1_N0_100+   | 0.0199 $\pm$ 0.0027    | 0.102 $\pm$ 0.021                  | 0.0012 $\pm$ 0.0004    | 0.02 $\pm$ 0.003     |
| P0_N1_100+   | 0.0032 $\pm$ 0.0027    | 0.026 $\pm$ 0.023                  | <LOD                   | <LOD                 |
| P1_N1_100+   | 0.0172 $\pm$ 0.0021    | 0.074 $\pm$ 0.02                   | 0.0011 $\pm$ 0.0003    | 0.016 $\pm$ 0.006    |
| <b>leaf</b>  |                        |                                    |                        |                      |
| P0_N0_70     | 0.1103 $\pm$ 0.0141    | 0.591 $\pm$ 0.141                  | 0.0195 $\pm$ 0.0297    | 0.113 $\pm$ 0.184    |
| P1_N0_70     | 0.4512 $\pm$ 0.0757    | <b>2.731 <math>\pm</math>0.976</b> | 0.0096 $\pm$ 0.0005    | 0.134 $\pm$ 0.034    |
| P0_N1_70     | 0.0183 $\pm$ 0.0051    | 0.142 $\pm$ 0.097                  | 0.003 $\pm$ 0.0018     | 0.014 $\pm$ 0.007    |
| P1_N1_70     | 0.1098 $\pm$ 0.0168    | 0.306 $\pm$ 0.088                  | 0.0022 $\pm$ 0.0006    | 0.024 $\pm$ 0.007    |
| P0_N0_100+   | 0.1766 $\pm$ 0.0313    | 1.15 $\pm$ 0.641                   | 0.0068 $\pm$ 0.0008    | 0.104 $\pm$ 0.024    |
| P1_N0_100+   | 0.4869 $\pm$ 0.078     | <b>2.465 <math>\pm</math>0.374</b> | 0.0134 $\pm$ 0.0021    | 0.239 $\pm$ 0.058    |
| P0_N1_100+   | 0.0263 $\pm$ 0.0068    | 0.202 $\pm$ 0.058                  | 0.0023 $\pm$ 0.0016    | 0.066 $\pm$ 0.068    |
| P1_N1_100+   | 0.1677 $\pm$ 0.0294    | 0.713 $\pm$ 0.175                  | 0.008 $\pm$ 0.0005     | 0.111 $\pm$ 0.015    |
| <b>stem</b>  |                        |                                    |                        |                      |
| P0_N0_70     | 0.022 $\pm$ 0.004      | 0.118 $\pm$ 0.036                  | 0.002 $\pm$ 0.0003     | 0.012 $\pm$ 0.005    |
| P1_N0_70     | 0.1071 $\pm$ 0.0333    | 0.627 $\pm$ 0.199                  | 0.0023 $\pm$ 0.0003    | 0.031 $\pm$ 0.007    |
| P0_N1_70     | 0.0309 $\pm$ 0.0057    | 0.247 $\pm$ 0.184                  | 0.002 $\pm$ 0.0003     | 0.01 $\pm$ 0.004     |
| P1_N1_70     | 0.0969 $\pm$ 0.055     | 0.266 $\pm$ 0.184                  | 0.0026 $\pm$ 0.0005    | 0.029 $\pm$ 0.011    |
| P0_N0_100+   | 0.0347 $\pm$ 0.0066    | 0.22 $\pm$ 0.11                    | 0.0015 $\pm$ 0.0001    | 0.024 $\pm$ 0.004    |
| P1_N0_100+   | 0.076 $\pm$ 0.0111     | 0.385 $\pm$ 0.06                   | 0.003 $\pm$ 0.0008     | 0.054 $\pm$ 0.016    |
| P0_N1_100+   | 0.0462 $\pm$ 0.0058    | 0.356 $\pm$ 0.079                  | 0.0021 $\pm$ 0.0008    | 0.058 $\pm$ 0.029    |
| P1_N1_100+   | 0.1118 $\pm$ 0.0187    | 0.487 $\pm$ 0.173                  | 0.0026 $\pm$ 0.0002    | 0.037 $\pm$ 0.005    |
